1 **Title:** Novel compartmental models of infectious disease transmission

2

3 **Authors:** Scott Greenhalgh<sup>a\*</sup>, Carly Rozins<sup>b</sup>

4

5 **Affiliations:**

6 <sup>a</sup> Siena College, Department of Mathematics, Loudonville, NY, 12211, USA.

7 email: [sgreenhalgh@siena.edu](mailto:sgreenhalgh@siena.edu)

8 <sup>b</sup> University of California Berkeley, Department of Integrative Biology, Berkeley, CA, 94720, USA.

9 email: [crozins@berkeley.edu](mailto:crozins@berkeley.edu)

10

11 \* Corresponding author

12

13

14 **Author contributions:**

15 SG conceptualized the project. CR and SG conducted formal analysis, wrote, reviewed, and edit the  
16 project manuscript.

17

18

19  
20  
21  
22  
23  
24  
25  
26  
27  
28  
29  
30  
31  
32  
33  
34  
35  
36  
37  
38  
39  
40  
41

## Abstract

Many methodologies in disease modeling are invaluable in the evaluation of health interventions. Of these methodologies, one of most fundamental is compartmental modeling. Compartmental models have many different forms with one of the most general characterizations occurring from the description of disease dynamics with nonlinear Volterra integral equations. Despite this generality, the vast majority of disease modellers prefer the special case where nonlinear Volterra integral equations reduce to systems of differential equations through the traditional assumptions that 1) the infectiousness of a disease corresponds to incidence, and 2) the duration of infection follows either an exponential or Erlang distribution. However, these assumptions are not the only ones that simplify nonlinear Volterra integral equations in such a way. In what follows, we illustrate a biologically more accurate description of the total infectivity of a disease that reduces systems of nonlinear Volterra integral equations to a class of novel compartmental models, as described by systems of differential equations. We demonstrate the consistency of these novel compartmental models to their traditional counterparts when the duration of infection follows either an exponential or Erlang distribution, and provide a novel compartmental model for a Pearson distributed duration of infection. Significant outcomes of our work include a compartmental model that captures any Erlang distributed duration of infection with only 3 differential equations, instead of the typical inflated model sizes, and a compartmental models that capture any mean, standard deviation, skewness, and kurtosis of the duration of infection distribution with only 4 differential equations.

**Keywords:** Differential equations, integral equations, infectious disease models, compartmental models, disease infectivity, survival analysis, infectious period

42 **Author summary:**

43 Compartmental models are a powerful tool for predicting disease outbreaks, and evaluating public  
44 health policies and intervention effectiveness. However, such models typically have an inability to  
45 account for many of the biological features of a disease. For instance, the assumptions placed on the  
46 duration of infection required by most compartmental models are due to mathematical convenience,  
47 and are known to massively effect model behavior and quality of predictions. Our work illustrates a  
48 simple solution to these erroneous assumptions by proposing a new simplification of the general model  
49 proposed by Kermack and McKendrick. In doing so, we obtain a new class of compartmental models  
50 with many of the features that make traditional compartmental the go-to disease model for the vast  
51 majority the epidemiological modeling community, such as their formulations as systems of differential  
52 equations, while adding the ability to more accurately account for effects of variability in an individual's  
53 duration of infection. As such, our work may be viewed as the starting point for multiple research  
54 avenues, as it opens up a new class of compartmental model for investigation under the contexts of  
55 mathematics, public health, and evolutionary biology.

56

57

58

59

60

61

62

63

## 1. Introduction

64 The compartmental model of Kermack and McKendrick [1–3] is arguably one of the greatest  
65 development in disease modeling. The formulation of this model, in its original form as a system of  
66 nonlinear Volterra integral equations [4], provides a general characterization of the transmission cycle  
67 between susceptible individuals and a disease that propagates throughout an environment [5]. Despite  
68 this generality, the vast majority of disease modellers prefer differential equation compartmental  
69 models [6]. While this particular formulation of compartmental models has distinct advantages, such as  
70 the non-requirement of specialist knowledge to implement and well-developed numerical methods [7],  
71 they are in fact a special case of the aforementioned system of nonlinear Volterra integral equations [8].  
72 Specifically, one obtains differential equation compartmental models from the nonlinear Volterra  
73 integral equations by imposing only two traditional assumptions: 1) the infectiousness of a disease  
74 corresponds to disease incidence, and 2) the duration of infection follows either an exponential or an  
75 Erlang distribution. Unfortunately, the vast majority of diseases do not have infectious periods that  
76 follow these distributions [9–14], and force fitting such a distributional structure is known to have a  
77 massive effect on the behavior and quality of model predictions [15]. Regardless of these issues, the  
78 compartmental models obtained by the two traditional assumptions have undergone many extensions.  
79 A few noteworthy examples include modifying the force of infection to account for the saturation of  
80 infection in a population [16,17], behavioral characteristics [18–21], modification of the recovery rate to  
81 better capture a disease’s infectious period [22], disease burnout [23], and the inclusion of additional  
82 disease stages [8]. Furthermore, the applications of these models have also grown considerably from  
83 just predicting a disease’s trajectory. Today, these traditional compartmental models are used to  
84 evaluate the health benefits and cost-effectiveness of public health policies and disease interventions  
85 [24,25], gauge the potential for disease virulence evolution [26], predict dominant influenza strains [27],  
86 investigate the complexities of disease co-infection [28], among many others. However, despite this

87 growth in theory and application, the generalization of the very foundational assumptions that simplifies  
88 systems of nonlinear Volterra integral equations to differential equation compartmental models remains  
89 largely undeveloped.

90 In what follows, we propose new assumptions to simplify systems of nonlinear Volterra integral  
91 equations to systems of differential equations. The biological motivation for these new assumptions  
92 stem from the idea that a disease's average duration of infection changes throughout an epidemic,  
93 whereas the average infectious period of a disease remains constant. Consequently, we extend current  
94 models from solely tracking the disease incidence to tracking the number of person-days of infected  
95 individuals. To do this, we assume 1) the total infectiousness of a disease corresponds to the product of  
96 disease incidence with a time-varying average duration of infection and 2) the duration of infection is  
97 distributed according to a non-homogeneous analog to the exponential distribution. Under these  
98 assumptions, we derive a novel class of differential equation compartmental models, provide model  
99 equilibria, and disease reproductive numbers [29].

100 Essential in the development of this new class of models is the use of survival analysis. Specifically the  
101 development of our novel class of models requires the hazard function and the mean residual waiting-  
102 time of a distribution [30,31], which is used to describe the time-varying average duration of infection.  
103 Therefore, we briefly outline some of the fundamental properties of these functions, in addition to their  
104 relationship to one another. We then demonstrate the consistency of our new class of models to  
105 traditional models when the duration of infection follows an exponential distribution. Next, we consider  
106 our model with a duration of infection that follows an Erlang distribution, and illustrate how this choice  
107 of distribution has a representation as either an ODE system of 3 equations, regardless of the Erlang  
108 distribution parameters, or as an ODE system that features a chain of infected equations, as is typical  
109 from the linear chain trick [9,32,33]. Finally, we consider a duration of infection that is Pearson

110 distributed. In choosing the Pearson distribution, we develop a model that is capable of accounting for  
111 any possible mean, standard deviation, skewness, and kurtosis of the duration of infection. Thereby, we  
112 provide a simple approach for measuring how altering the infectivity profile of a disease, as described by  
113 the first four statistical moments, influences a diseases trajectory.

114

115

## 2. Methods

116 In what follows, we develop a novel class of ODE compartmental models to describe the progression of  
117 a disease throughout a population. To obtain such models, we impose new assumptions on the notion  
118 of infectivity used in the integral equations of Kermack and McKendrick. Before reducing the integral  
119 equations of Kermack and McKendrick to their differential equation counterparts, we briefly highlight  
120 the formal relationship in our assumptions in the context of survival analysis. Finally, we present the  
121 class of novel compartmental models, their equilibria, and basic reproductive number.

122 **2.1 Traditional compartmental models.** To begin, considered the general compartmental model of  
123 Kermack and McKendrick [1–3,5]. For this general compartmental model, we consider the number of  
124 susceptible individuals to be denoted as  $S$ , and the total infectivity of the disease (at time  $t$ ) to be  
125 denoted as  $\phi(t)$ . We define  $\phi(t)$  as the sum of the products of the number of individuals at a particular  
126 age of infection that remain infectious with their mean infectivity for that particular infection age. We  
127 also define  $\phi_0$  as the total infectivity of the individuals initial infected with the disease at the start of the  
128 epidemic. In addition, we characterize the fraction of infected individuals remaining infected at time  $t$ ,  
129 who where initially infected at time  $x$ , with the duration of infection distribution, as described by the  
130 survival function  $P(t,x)$ . Furthermore, we also define the mean infectivity of an infected individual  $t - x$   
131 units of time after the start of the infection as  $\pi(t - x)$ , where  $0 \leq \pi(t - x) \leq 1$ , and the mean  
132 infectivity of individuals in the population at time  $t$  who where initially infected at time  $x$  as

133 
$$A(t,x) = \pi(t-x)P(t,x).$$

134 For simplicity, we assume that  $\pi(t-x) = 1$ , and so the progression of an epidemic throughout a  
135 population can be described with the integral equations,

$$S(t) = S_0 - \int_0^t \lambda(x)S(x)dx, \tag{1}$$

$$\phi(t) = \phi_0(t) + \int_0^t \lambda(x)S(x)P(t,x)dx.$$

136 Here  $\lambda$  is the force of infection, which we assume to be

$$\lambda(t) = \beta \frac{\phi(t)}{N}, \tag{1b}$$

137 where  $\beta$  is the average number of contacts individuals in a population make per unit of time.

138 Traditionally, to reduce (1) to a system of differential equations requires that 1) the duration of infection  
139 follows the exponential distribution,

140 
$$P(t,x) = e^{-\gamma(t-x)},$$

141 where  $\gamma$  is the recovery rate, and 2) that the infectiousness of a disease corresponds directly to the  
142 number of infected individuals,  $\phi = I$ . Combining these assumptions, along with an additional  
143 compartment to track recovered individuals,  $R$ , transforms system (1) into

$$S(t) = S_0 - \int_0^t \beta \frac{I(x)}{N} S(x)dx, \tag{2}$$

$$I(t) = I_0 e^{-\gamma t} + \int_0^t \beta \frac{I(x)}{N} S(x) e^{-\gamma(t-x)} dx,$$

$$R(t) = (R_0 + I_0 - I_0 e^{-\gamma t}) + \int_0^t \beta \frac{I(x)}{N} S(x) (1 - e^{-\gamma(t-x)}) dx.$$

144 An important feature of system (2) is that it conserves the total population:

$$145 \quad S(t) + I(t) + R(t) = S_0 + I_0 + R_0 = N.$$

146 Differentiating system (2) with respect to  $t$ , and substituting the integral equation for  $I(t)$  for the

147 remaining integrals yields the classic SIR system:

$$S'(t) = -\beta \frac{I(t)}{N} S(t),$$

$$I'(t) = \beta \frac{I(t)}{N} S(t) - \gamma I(t), \quad (2b)$$

$$R'(t) = \gamma I(t).$$

148 Alternatively, (1) reduces to a system of differential equations when 1) the duration of infection is the

149 survival function of the Erlang distribution,

$$150 \quad P(t, x) = P(t - x) = \sum_{j=0}^{k-1} \frac{(\gamma(t-x))^j}{j!} e^{-\gamma(t-x)},$$

151 where  $k$  is a shape parameter that determines the total number of infection stages and  $\frac{1}{\gamma}$  is the average

152 duration spent in each stage, and 2) the total infectivity of the disease corresponds to  $k$  identical stages

153 (in terms of the average duration spent in each stage) of infected individuals,



154

$$\phi = I = \sum_{j=1}^k I_j.$$

155 Combining these assumptions, along with an additional compartment to track recovered individuals,  $R$ ,

156 transforms system (1) into

$$S(t) = S_0 - \int_0^t \beta \frac{I(x)}{N} S(x) dx,$$

$$I(t) = I_0 \sum_{j=0}^{k-1} \frac{(\gamma t)^j}{j!} e^{-\gamma t} + \int_0^t \beta \frac{I(x)}{N} S(x) \sum_{j=0}^{k-1} \frac{(\gamma(t-x))^j}{j!} e^{-\gamma(t-x)} dx, \quad (3)$$

$$R(t) = \left( R_0 + I_0 - I_0 \sum_{j=0}^{k-1} \frac{(\gamma t)^j}{j!} e^{-\gamma t} \right) + \int_0^t \beta \frac{I(x)}{N} S(x) \left( 1 - \sum_{j=0}^{k-1} \frac{(\gamma(t-x))^j}{j!} e^{-\gamma(t-x)} \right) dx.$$

157 Equivalently, if the linear chain trick is applied, we have that

$$158 \quad I_j(t) = I_{0,j} \frac{(\gamma t)^{j-1}}{(j-1)!} e^{-\gamma t} + \int_0^t \beta \frac{I(x)}{N} S(x) \frac{(\gamma(t-x))^{j-1}}{(j-1)!} e^{-\gamma(t-x)} dx,$$

159 where

$$160 \quad I(t) = \sum_j I_j(t).$$

161 An important feature of system (3) is that it conserves the total population:

$$162 \quad S(t) + I(t) + R(t) = S_0 + \sum_j I_{0,j} + R_0 = N.$$

163 Differentiating system (3) with respect to  $t$ , applying the ‘linear chain trick’, and substituting  $\gamma I_j(t)$  as

164 needed yields the classic SI<sup>k</sup>R system:

$$S'(t) = -\beta \frac{I(t)}{N} S(t),$$

$$I_1'(t) = \beta \frac{\sum_{j=1}^k I_j(t)}{N} S(t) - \gamma I_1(t), \quad (3b)$$

$$I_j'(t) = \gamma I_{j-1}(t) - \gamma I_j(t),$$

$$R'(t) = \gamma I_j(t).$$

165 To obtain our novel differential equation compartmental models, we generalize the assumptions used to  
166 formulate system (2). We first assume the infectiousness of a disease corresponds to the product of the  
167 number of infected individuals with their average duration of infectiousness at time  $t$ :

$$\phi(t) = I(t)m(t). \quad (4)$$

168 Here  $m(t)$  is a mean residual waiting-time [31]. Motivation for choosing  $m(t)$  over the typical (constant)  
169 average waiting-time stems from the fact that the composition of infected individuals  $I(t)$  includes  
170 individuals from different initial infection times, and that individuals infected at different times are not  
171 likely to remain infectious for the same time period. By including  $m(t)$  in (4), our notion of infectivity is  
172 able to differentiate between similar quantities of infected individuals that may (or may not) contribute  
173 differently to the spread of an epidemic.

174 In addition to assumption (4), we also assume that the duration of infection distribution corresponds to  
175 a non-homogeneous analog of the exponential distribution, namely the survival function given by

$$P(t,x) = P(T > t | T > x) = \frac{P(T > t)}{P(T > x)} = \frac{e^{-\int_0^t \eta(z) dz}}{e^{-\int_0^x \eta(z) dz}} = e^{-\int_x^t \eta(z) dz}, \quad (5)$$

176 where  $t \geq x$ , and  $T$  is a random variable that denotes the sojourn time in the infectious state.

177 **2.2 The hazard function and mean residual waiting-time.** Due to the importance of assumptions (4) and  
 178 (5), we now provide a brief overview of the relationship between the hazard function, the mean residual  
 179 waiting-time, and the survival function [30]. Consider a random variable  $T$  characterized by the survival  
 180 function (5), which represents the probability of remaining infectious  $t$  units after becoming infectious  
 181 at time  $x$ . The associated hazard function to  $T$  is given by

$$\eta(t) = -\frac{1}{P(t,x)} \frac{dP}{dt}, \quad (6)$$

182 where  $P(t,x)$  is the survival function (for remaining infected) for individuals initially infected at time  $x$ .

183 Similarly, the mean residual waiting-time associated with  $T$  is also determined from (5) [30], and

184 defined as

$$m(t) = \mathbb{E}[T - t | T > t] = \frac{1}{P(t,x)} \int_t^{\infty} P(z,x) dz. \quad (7)$$

185 From the mean residual waiting-time (7), it is also possible to uniquely determine the hazard function (6)

186 through the relation [30],

$$\eta(t) = \frac{m'(t) + 1}{m(t)}. \quad (8)$$

187 An important feature of the mean residual waiting-time (7) is that it is initially equivalent to the average

188 duration of infectiousness, as

$$\lim_{t \rightarrow 0} m(t) = \lim_{t \rightarrow x} \frac{1}{P(t,x)} \int_x^{\infty} P(z,x) dz = \mu. \quad (9)$$

189 It follows from (7) and (8), and through the application of l'Hôpital's rule, that

$$\lim_{t \rightarrow \infty} \frac{m'(t) + 1}{\eta(t)} = \lim_{t \rightarrow \infty} \frac{1}{P(t,x)} \int_t^{\infty} P(z,x) dz = \lim_{t \rightarrow \infty} -\frac{P(t,x)}{\frac{dP}{dt}} = \lim_{t \rightarrow \infty} \frac{1}{\eta(t)}. \quad (10)$$

190 This implies if  $\eta(t) > 0 \forall t$  that

$$\lim_{t \rightarrow \infty} m'(t) = 0. \quad (11)$$

191 In addition to determining  $\eta(t)$  from  $m(t)$ , the reciprocal relation is also possible. For convenience we

192 restrict (5) to the family of distributions [30] that satisfy

$$g'(t) \frac{dP}{dt} + g(t) \frac{d^2P}{dt^2} = (\mu - t) \frac{dP}{dt}. \quad (12)$$

193 Note condition (12) ensures that both  $m(t)$  and  $\eta(t)$  exist and are finite [30]. Integrating (12) over  $[t, \infty)$ ,

194 and using the property that  $\lim_{t \rightarrow \infty} P(t,x) = 0$ , we obtain

$$-g(t) \frac{dP}{dt} = -\mu P(t,x) - \int_t^{\infty} t \frac{dP}{dt} dt. \quad (13)$$

195 Noting that  $\int_t^{\infty} t \frac{dP}{dt} dt = \mathbb{E}[T|T > t]$ , definitions (6) and (7), and dividing through by  $P(t,x)$  we obtain

$$\mathbb{E}[T|T > t] = \mu + g(t)\eta(t). \quad (14)$$

196 Thus, subtracting  $t$  from both sides we have that

$$m(t) = \mu - t + g(t)\eta(t). \quad (15)$$

197 **2.3 Novel compartmental models.** Before presenting the novel compartmental model we briefly  
 198 contextualize its differences in comparison to traditional compartmental models. The traditional  
 199 compartmental models of (2b) and (3b) track the changes in the number of persons susceptible to,  
 200 infected with, and recovered from infection for a disease circulating in a population. The premise of our  
 201 novel compartmental model is to instead consider tracking the change in the number of person-days  
 202 (i.e. the number of people in a particular state multiplied by a duration of time) susceptible to, infected  
 203 with, and recovered from infection for a disease circulating in a population. Therefore, to appropriately  
 204 account for the temporal aspect of person-days we incorporate  $m(t)$  into each compartment and the  
 205 total population. Thus, we have that the person-days of the susceptible, infected, and recovered  
 206 individuals in a population are governed by,

$$S(t)m(t) = Nm(t) - (I_0 + R_0)\mu - \int_0^t \lambda(x)S(x)dx,$$

$$I(t)m(t) = I_0P(t,0)\mu + \int_0^t \lambda(x)S(x)P(t,x)dx, \quad (16)$$

$$R(t)m(t) = (R_0 + I_0 - I_0P(t,0))\mu + \int_0^t \lambda(x)S(x)(1 - P(t,x))dx,$$

207 where  $m(0) = \mu$  by (9), and  $P(t,x)$  is given by (5). Note, the term  $Nm(t) - (I_0 + R_0)\mu$  accounts for  
 208 changes in the time-varying reference frame for the total person-days of those susceptible to infection  
 209 in the population.

210 Adding the equations of system (16) together, it follows that

$$211 \quad (S(t) + I(t) + R(t))m(t) = Nm(t) - (N - S_0 - I_0 - R_0)\mu.$$

212 Given  $N = S_0 + I_0 + R_0$  and  $m(t) \neq 0$  for all  $t$ , we have that

213 
$$S(t) + I(t) + R(t) = N.$$

214 Imposing (4-7), taking the time derivative of system (16), and applying Leibniz rule for the derivatives of  
 215 integrals as needed, we obtain

$$S'(t)m(t) + S(t)m'(t) = Nm'(t) - \beta \frac{I(t)}{N} m(t) S(t),$$

$$I'(t)m(t) + I(t)m'(t) = -\eta(t)I_0P(t,0)\mu - \eta(t) \int_0^t \beta \frac{I(x)}{N} m(x) S(x) P(t,x) dx + \beta \frac{I(t)}{N} m(t) S(t), \quad (18)$$

$$R'(t)m(t) + R(t)m'(t) = \eta(t)I_0P(t,0)\mu + \eta(t) \int_0^t \beta \frac{I(x)}{N} m(x) S(x) P(t,x) dx,$$

216 where  $P(t,x)$  is given by (5), and  $\eta(t)$  is given by (8).

217 Substituting (16) into (1) to eliminate the integrals, and isolating for each of  $S'(t)$ ,  $I'(t)$ , and  $R'(t)$ , we  
 218 obtain:

$$S'(t) + \frac{m'(t)}{m(t)} S(t) = N \frac{m'(t)}{m(t)} - \beta \frac{I(t)}{N} S(t),$$

$$I'(t) + \frac{m'(t)}{m(t)} I(t) = \beta \frac{I(t)}{N} S(t) - \left( \frac{m'(t) + 1}{m(t)} \right) I(t), \quad (19)$$

$$R'(t) + \frac{m'(t)}{m(t)} R(t) = \left( \frac{m'(t) + 1}{m(t)} \right) I(t).$$

219 **2.4 Equilibria, the basic reproductive number  $\mathcal{R}_0$ , and the effective reproductive number  $\mathcal{R}_e$ .** The

220 compartmental model (19) potentially has several equilibria. As is standard, (19) possess the standard

221 disease free equilibrium:

$$\begin{aligned}
 S^* &= N, \\
 I^* &= 0, \\
 R^* &= 0.
 \end{aligned}
 \tag{20}$$

222 In addition, an equilibrium where the infection was exhausted, leaving susceptible individuals that  
 223 escaped infection, and recovered individuals:

$$\begin{aligned}
 \hat{S} &= S_\infty, \\
 \hat{I} &= 0, \\
 \hat{R} &= R_\infty.
 \end{aligned}
 \tag{21}$$

224 Turning our attention to the reproductive numbers of the disease, the basic reproductive number  
 225 obtained directly from the survival function is

$$\mathcal{R}_0 = \beta \int_0^\infty P(t,0) dt = \beta \mu.$$

227 To estimate the basic reproductive number using the next-generation method, we have that  $\mathcal{F} = \frac{\beta}{N}S$  and

228  $\mathcal{V}^{-1} = \frac{m(t)}{m'(t)+1}$ . Note, the motivation for  $\mathcal{V}^{-1} = \frac{m(t)}{m'(t)+1}$  instead of  $\mathcal{V}^{-1} = \frac{m(t)}{2m'(t)+1}$  arises from the  $\frac{m'(t)}{m(t)}I$

229  $(t)$  accounting for a change in average duration of infectivity, instead of the transfer of infected

230 individuals to the recovered state. It follows that

$$\hat{\mathcal{R}}_0 = \rho(\mathcal{F}|_{DFE} \cdot \mathcal{V}^{-1}|_{DFE}) = \beta m^*,
 \tag{22}$$

231 where

232 
$$m^* \in \left[ \lim_{t \rightarrow \infty} \frac{m(t)}{m'(t) + 1}, \lim_{t \rightarrow 0} \frac{m(t)}{m'(t) + 1} \right]$$

233 Finally, we consider the effective reproductive number, in the face of time variability of  $m(t)$ ,  $m'(t)$ , and  
234  $S(t)$ , to be

$$\mathcal{R}_e(t) = \frac{\beta m(t) S(t)}{m'(t) + 1 N}. \quad (23)$$

235

### 236 3. Special cases of the duration of infection distribution

237 We now consider the duration of infection distributions used in traditional differential equation  
238 compartmental models, namely the exponential distribution, and the Erlang distribution. In addition, we  
239 illustrate a compartmental model that accounts for any mean, standard deviation, skewness, and excess  
240 kurtosis, by assuming that the duration of infection is Pearson distributed.

241 **3.1 The exponential distribution.** If the duration of infection is exponentially distributed, then the  
242 associated survival function at the onset of the epidemic is  $P(t,x) = e^{-\gamma(t-x)}$ . Under this assumption,  
243 we have that [30],

$$\eta(t) = -\frac{1}{P(t,x)} \frac{dP}{dt} = \gamma, \quad (24)$$

244 and

$$g(t) = \frac{1}{\gamma} t. \quad (25)$$

245 Solving (8) under the assumption of (25) yields,



$$m(t) = \frac{1}{\gamma}. \quad (26)$$

246 Substituting (26) into (19), we arrive at the traditional form of differential equation compartmental  
247 models:

$$S'(t) = -\beta \frac{I(t)}{N} S(t),$$

$$I'(t) = \beta \frac{I(t)}{N} S(t) - \gamma I(t), \quad (27)$$

$$R'(t) = \gamma I(t).$$

248 Finally, because  $m(t) = \frac{1}{\gamma} = \mu$ , the basic reproductive numbers are

$$\mathcal{R}_0 = \frac{\beta}{\gamma} \text{ and } \widehat{\mathcal{R}}_0 = \frac{\beta}{\gamma} \quad (28)$$

249

250 **3.5 The Erlang distribution.** If the duration of infection is Erlang distributed, then the survival function is

$$P(t,x) = \frac{P(T > t)}{P(T > x)} = \left( \sum_{j=0}^{k-1} \frac{(\gamma x)^j}{j!} e^{-\gamma x} \right)^{-1} \sum_{j=0}^{k-1} \frac{(\gamma t)^j}{j!} e^{-\gamma t}. \quad (29)$$

251 Note, this formulation of an Erlang distributed random variable differs from that used in the derivation  
252 of traditional compartmental models, as in general  $P(t,x) \neq P(t-x)$ .

253 From (6) and (29), it follows that

$$\eta(t) = \left( \sum_{j=0}^{k-1} \frac{(\gamma t)^j}{j!} e^{-\gamma t} \right)^{-1} \frac{\gamma (\gamma t)^{k-1}}{(k-1)!} e^{-\gamma t} = \left( \sum_{j=0}^{k-1} \frac{(\gamma t)^j}{j!} \right)^{-1} \frac{\gamma (\gamma t)^{k-1}}{(k-1)!}. \quad (30)$$

254 We also have that [30]

$$g(t) = \frac{1}{\gamma} t. \quad (31)$$

255 Substituting (31) in (8), we obtain the mean residual waiting-time:

$$m(t) = \frac{k}{\gamma} - t + \frac{1}{\gamma} t \left( \sum_{j=0}^{k-1} \frac{(\gamma t)^j}{j!} \right)^{-1} \frac{\gamma (\gamma t)^{k-1}}{(k-1)!}. \quad (32)$$

256 Using (32) and its derivative in system (19), we obtain a compartmental model of only 3 equations that

257 features a duration of infection that is Erlang distributed, regardless of the value of  $k$ .

258 We now apply ‘linear chain trickery’ [9,32,33] to the obtained compartmental model of only 3 equations

259 to further illustrate the effects of a duration of infection that is Erlang distributed.

260

261 Imposing the assumption of (30)-(32) on (22), we have that

$$m(t)I(t) = I_0 \frac{k}{\gamma} \sum_{j=0}^{k-1} \frac{(\gamma t)^j}{j!} e^{-\gamma t} + \int_0^t \frac{\beta}{N} I(x) m(x) S(x) \left( \sum_{j=0}^{k-1} \frac{(\gamma x)^j}{j!} e^{-\gamma x} \right)^{-1} \left( \sum_{j=0}^{k-1} \frac{(\gamma t)^j}{j!} e^{-\gamma t} \right) dx. \quad (33)$$

262 Differentiating yields

$$m'(t)I(t) + m(t)I'(t) = I_0 \frac{k}{\gamma} \left( \frac{-\gamma (\gamma t)^{k-1}}{(k-1)!} \right) e^{-\gamma t} + \int_0^t \frac{\beta}{N} I(x) m(x) S(x) \left( \sum_{j=0}^{k-1} \frac{(\gamma x)^j}{j!} e^{-\gamma x} \right)^{-1} \left( \frac{-\gamma (\gamma t)^{k-1}}{(k-1)!} e^{-\gamma t} \right) dx + \frac{\beta}{N} I(t) m(t) S(t). \quad (34)$$

263 Mimicking the method of stages, we define

$$m_j(t)I_j(t) = I_0 \frac{k((\gamma t)^{j-1})}{\gamma(j-1)!} e^{-\gamma t} + \int_0^t \frac{\beta}{N} I(x)m(x)S(x) \left( \sum_{i=0}^{k-1} \frac{(\gamma x)^i}{i!} e^{-\gamma x} \right)^{-1} \left( \frac{(\gamma t)^{j-1}}{(j-1)!} e^{-\gamma t} \right) dx, \quad (35)$$

264 for  $1 \leq j \leq k$ .

265

266 Thereby, from (34) and (35), we have that

$$m'(t)I(t) + m(t)I'(t) = -\gamma m_k(t)I_k(t) + \frac{\beta}{N} I(t)m(t)S(t). \quad (36)$$

267 By differentiating (35), making the appropriate substitutions of  $-\gamma m_j(t)I_j(t)$  and  $\gamma m_{j-1}(t)I_{j-1}(t)$ , and

268 recognizing that  $\left( \sum_{i=0}^{k-1} \frac{(\gamma t)^i}{i!} \right)^{-1} \left( \frac{(\gamma t)^{j-1}}{(j-1)!} \right) = \frac{(k-1)!}{(j-1)! \gamma (\gamma t)^{k-j}}$ , we have that

$$m'_j(t)I_j(t) + m_j(t)I'_j(t) = -\gamma m_j(t)I_j(t) + \gamma m_{j-1}(t)I_{j-1}(t) + \frac{\beta}{N} I(t)m(t)S(t) \frac{(k-1)!}{(j-1)! \gamma (\gamma t)^{k-j}} \eta(t). \quad (37)$$

269 for  $1 < j \leq k$ , and when  $j = 1$ ,

$$m'_1(t)I_1(t) + m_1(t)I'_1(t) = -\gamma m_1(t)I_1(t) + \frac{\beta}{N} I(t)m(t)S(t) (k-1)! \frac{\eta(t)}{\gamma (\gamma t)^{k-1}}. \quad (38)$$

270 Summing over the index yields,

$$\sum_{j=1}^k m'_j(t)I_j(t) + m_j(t)I'_j(t) = -\gamma m_k(t)I_k(t) + \frac{\beta}{N} I(t)m(t)S(t) \eta(t) \sum_{j=0}^{k-1} \frac{(k-1)!}{j!} \frac{1}{\gamma (\gamma t)^{k-j-1}}, \quad (39)$$

271 Noting that  $\sum_{j=0}^{k-1} \frac{(k-1)!}{j!} \frac{1}{\gamma (\gamma t)^{k-j-1}} = \frac{1}{\eta(t)}$ , it follows from (36) that

$$m'(t)I(t) + m(t)I'(t) = \sum_{j=1}^k m'_j(t)I_j(t) + m_j(t)I'_j(t), \quad (40)$$

and

$$m(t)I(t) = \sum_{j=1}^k m_j(t)I_j(t). \quad (41)$$

272 Thereby, using (41) and simplifying the expression of  $\eta(t) \sum_{j=0}^{k-1} \frac{1}{j!} \frac{1}{\gamma(\gamma t)^{k-j-1}}$ , we have that

$$\begin{aligned} & m'_j(t)I_j(t) + m_j(t)I'_j(t) \\ & = -\gamma m_j(t)I_j(t) + \gamma m_{j-1}(t)I_{j-1}(t) + \frac{\beta}{N} \left( \sum_{i=1}^k m_i(t)I_i(t) \right) S(t) \left( \sum_{i=0}^{k-1} \frac{(j-1)!}{i!} \frac{1}{(\gamma t)^{j-i-1}} \right) \end{aligned} \quad (42)$$

and

$$m'_1(t)I_1(t) + m_1(t)I'_1(t) = -\gamma m_1(t)I_1(t) + \frac{\beta}{N} \left( \sum_{i=1}^k m_i(t)I_i(t) \right) S(t) \left( \sum_{i=0}^{k-1} \frac{(j-1)!}{i!} \frac{1}{(\gamma t)^{j-i-1}} \right)^{-1}. \quad (43)$$

273 Isolating (42)-(43) for  $I'_j(t)$  and  $I'_1(t)$ , respectively, we arrive at

$$I'_1(t) = - \left( \frac{m'_1(t)}{m_1(t)} + \gamma \right) I_1(t) + \frac{1}{m_1(t)N} \beta \left( \sum_{i=1}^k m_i(t)I_i(t) \right) S(t) \left( \sum_{i=0}^{k-1} \frac{(j-1)!}{i!} \frac{1}{(\gamma t)^{j-i-1}} \right)^{-1}, \quad (44)$$

274 and

$$I'_j(t) = - \left( \frac{m'_j(t)}{m_j(t)} + \gamma \right) I_j(t) + \gamma \frac{m_{j-1}(t)}{m_j(t)} I_{j-1}(t) + \frac{1}{m_j(t)N} \beta \left( \sum_{i=1}^k m_i(t)I_i(t) \right) S(t) \left( \sum_{i=0}^{k-1} \frac{(j-1)!}{i!} \frac{1}{(\gamma t)^{j-i-1}} \right) \quad (45)$$

275 Finally, we consider the special case when individual stages feature identically constant waiting-times,

276 which implies that

$$I_1'(t) = -\gamma I_1(t) + \frac{\beta}{N} \left( \sum_{j=1}^k I_j(t) S(t) \right) \left( \sum_{i=0}^{k-1} \frac{1}{i!} (\gamma t)^{-i} \right)^{-1}, \quad (46)$$

and

$$I_j'(t) = -\gamma I_j(t) + \gamma I_{j-1}(t) + \frac{\beta}{N} \left( \sum_{i=1}^k I_i(t) \right) S(t) \left( \sum_{i=0}^{k-1} \frac{(j-1)!}{i!} \frac{1}{(\gamma t)^{j-i-1}} \right)^{-1}. \quad (47)$$

277 Through (29), (30) and (32), we reduce system (19) to a system of 3 differential equations based on an  
 278 Erlang distributed duration of infection, or through the ‘linear chain trick’ a system of  $k + 2$  differential  
 279 equations (i.e. (46)-(47),  $S'$  and  $R'$ ). An important distinction between (46)-(47) and the traditional  
 280 system of differential equations (3b) with an Erlang distributed duration of infection is that new  
 281 infections enter into any given infectious state in (46)-(47), based on a component of the duration of  
 282 infection distribution, whereas (3b) requires all new infections to enter the first stage of infection.  
 283 Thereby, (46)-(47) present an approach that is likely to better conserve the variation in infectious period,  
 284 at least relative to its traditional compartmental model counterparts.

285 Finally, in regards to the basic reproductive numbers, we have that  $\int_x^\infty P(t,x) dx = \frac{k}{\gamma}$ ,  $\lim_{t \rightarrow \infty} \frac{m(t)}{m'(t) + 1} = \frac{1}{\gamma}$  and

286  $\lim_{t \rightarrow 0} \frac{m(t)}{m'(t) + 1} = \frac{k}{\gamma}$ , so

$$\mathcal{R}_0 = \beta \frac{k}{\gamma}, \text{ and, } \widehat{\mathcal{R}}_0 \in \left[ \frac{\beta}{\gamma}, \beta \frac{k}{\gamma} \right]. \quad (48)$$

287 **3.3. The Pearson distribution.** If the duration of infection is Pearson distributed, then the associated  
 288 survival function does not possess a general closed form. Thus, we define the Pearson distribution as

$$P(t,x) = \frac{P(T > t)}{P(T > x)}$$

where (49)

$$\frac{d^2}{dt^2}P(t,x) = h(t;\mu,\sigma,\gamma_1,\gamma_2) \frac{d}{dt}P(t,x),$$

289 and

$$h(t;\mu,\sigma,\gamma_1,\gamma_2) = \frac{(-12\gamma_1^2 + 10\gamma_2 + 12)(t - \mu) + (\gamma_1\gamma_2 + 6\gamma_1)\sigma}{(3\gamma_1^2 - 2\gamma_2)(t - \mu)^2 - \sigma\gamma_1(\gamma_2 + 6)(t - \mu) + (3\gamma_1^2 - 12 - 4\gamma_2)\sigma^2}. \quad (50)$$

290 Note,  $\mu, \sigma, \gamma_1$ , and  $\gamma_2$  are the mean, standard deviation, skewness, and excess kurtosis of the duration of  
291 infection [30,34,35].

292 To obtain the mean residual waiting-time in terms of the hazard function, we have that [30,36]:

$$g(t) = \frac{1}{1 - 2c}(\sigma^2 a + \sigma b(t - \mu) + c(t - \mu)^2), \quad (51)$$

293 where  $a = \frac{13\gamma_1^2 - 4\gamma_2 - 12}{2(6\gamma_1^2 - 5\gamma_2 - 6)}$ ,  $b = -\frac{\gamma_1(\gamma_2 + 6)}{2(6\gamma_1^2 - 5\gamma_2 - 6)}$ , and  $c = \frac{3\gamma_1^2 - 2\gamma_2}{2(6\gamma_1^2 - 5\gamma_2 - 6)}$ .

294 It follows from (15) that the mean residual waiting-time is:

$$m(t) = \mu - t + \left( \frac{1}{1 - 2c}(\sigma^2 a + \sigma b(t - \mu) + c(t - \mu)^2) \right) \eta(t), \quad (52)$$

295 where  $c \neq 1/2$ .

296 Through the use of (8), we obtain from (52) a first order differential equation to determine  $m(t)$ :

$$m'(t) = \left( \frac{1}{1-2c} (\sigma^2 a + \sigma b(t-\mu) + c(t-\mu)^2) \right)^{-1} (m(t) + t - \mu)m(t) - 1, \quad (53)$$

297 provided  $\sigma^2 a + \sigma b(t-\mu) + c(t-\mu)^2 \neq 0$ , and  $c \neq \frac{1}{2}$ .

To ensure the mean residual waiting-time is finite we apply l'Hôpital's rule to obtain

$$\lim_{t \rightarrow \infty} m(t) = \lim_{t \rightarrow \infty} \frac{\mu - \int_0^t P(z,0) dz}{P(t,0)} = \lim_{t \rightarrow \infty} - \frac{P(t,0)}{\frac{dP}{dt}} = \lim_{t \rightarrow \infty} - \frac{\frac{dP}{dt}}{\frac{d^2 P}{dt^2}} = \lim_{t \rightarrow \infty} - \frac{1}{h(t; \mu, \sigma, \gamma_1, \gamma_2)}. \quad (54)$$

298 Thus, we require that  $3\gamma_1^2 - 2\gamma_2 = 0$  to force the terms involving  $t^2$  to drop out. Under this assumption,

299 we have that

$$\lim_{t \rightarrow \infty} - \frac{1}{h\left(t; \mu, \sigma, \gamma_1, \frac{3}{2}\gamma_1^2\right)} = \frac{1}{2}\sigma\gamma_1, \quad (55)$$

300 Given (55), the two formulations of the basic reproductive number are:

$$\mathcal{R}_0 = \beta\mu, \quad (56)$$

301 and

$$\hat{\mathcal{R}}_0 \in \left[ \frac{1}{2}\beta\sigma\gamma_1, \beta\mu \right]. \quad (57)$$

302 Note, the lower bound of (57) is consistent with the next-generation method estimate for the basic

303 reproductive numbers (28) and (48), as the Erlang distribution has moments  $\sigma = \frac{\sqrt{k}}{\gamma}$  and  $\gamma_1 = \frac{2}{\sqrt{k}}$ , which

304 implies  $\frac{1}{2}\sigma\gamma_1 = \frac{1}{\gamma}$ .

305

306

#### 4. Discussion

307 In this work, we presented a class of novel differential equation compartmental models by modifying  
308 the classical assumptions that simplify nonlinear Volterra integral equations into systems of differential  
309 equations. To do this, we generalize the notion of the total infectivity of a disease, and the  
310 representation of its duration of infection. We illustrate the consistency of our class of novel models to  
311 the traditional models for exponential and Erlang distributed durations of infections, present a new class  
312 of differential equation compartmental models based a Pearson distributed duration of infection, and  
313 provide equilibria and basic reproductive numbers for our approach.

314 The requirement that the duration of infection follows an exponential distribution is often a source of  
315 weakness with regards to the biological validity of differential equation compartmental models. While  
316 the extension of such models through the linear chain trick [9,32,33] to a duration of infection that  
317 follows the Erlang distribution alleviates this weakness to some degree, it does so at the cost of inflating  
318 the size of the compartmental model, and thereby increasing the computational complexity of the  
319 system. Our new class of models avoids this inflation, while retaining the benefits of having a  
320 distribution of infection that follows an Erlang distribution. Thereby our new class of models offer an  
321 approach to reduce model complexity in an era when the complexity of compartmental models is ever  
322 increasing. Furthermore, if one generalizes the concept of a function to include the survival function of  
323 the Gamma distribution, our new class of models advantageously accounts for any Gamma distribution  
324 parameter values, including non-integer cases.

325 A main advantage of the new class of models is that they are ODE based. Therefore, like the traditional  
326 compartmental models, they do not require specialist knowledge to use, and possess well-developed  
327 numerical methods for their simulation. Furthermore, the theoretical extensions of the traditional



328 models to include alternative formulations of the force of infection, state-dependent recovery rates, in  
329 addition to the inclusion of additional disease compartments are easily implemented in the new class of  
330 models. In addition, many of the applications of the traditional models, such as the study of multi-strain  
331 dynamics, health benefit analysis, and cost effectiveness analysis, should naturally carry over without  
332 the need to reinvent the procedures of each analysis.

333  
334 A potentially fruitful avenue for future applications of our new class of models is in the study of  
335 virulence and disease evolution. To elaborate, because our new class of model includes both the  
336 quantity of infected individuals and their duration of infection, it may serve as a better paradigm for  
337 investigating selective pressures that pathogens face, at least relative to traditional models. Similarly,  
338 our idea to track both the quantity of infected individuals along with their duration of infection could be  
339 adapted to study species competition, as a similar modification should provide stronger intuition on  
340 species fitness.

341  
342 A surprising outcome of our work is the discovery that the lower bound provided by the next-generation  
343 method estimate of the basic reproductive number for the Pearson distributed example depends on  
344 standard deviation and skewness, instead of the mean. As standard deviation and skewness indicate the  
345 spread and lean of a distribution, it seems reasonable that their combination makes for a decent proxy  
346 for the location of the middle of a distribution. While this could be a consequence of assuming that the  
347 duration of infection follows the Pearson distribution, it also highlights a potentially new approach to  
348 bound the basic reproductive number for a disease directly from data.

349  
350 The use of a duration of infection that is Pearson distributed may also open up an interesting avenue  
351 into bifurcation analysis. In particular, with modifications to incorporate demographic turnover or loss of

352 immunity, and the use of the Pearson distribution, one could investigate if a relationship exists between  
353 the occurrence of periodic cycles and the first four moments of the duration of infection. Thereby, one  
354 may be able to gain intuition as to whether bifurcations are likely to occur simply by examining  
355 statistical moments and the diseases transmission rate. In addition, through such modified models, it  
356 may be possible to determine the existence (or non-existence) of hopf bifurcations by examining  
357 whether  $m(t)$  is periodic, as this seems like it would a requirement for such behavior in reality.

358

359

360 As our new class of models are based on the integral equation version of the Kermack and McKendrick  
361 model, it shares this model's limitations. Namely, the assumptions of a sufficiently large and well-mixed  
362 population, the compartmentalization of diseases into distinct stages, and the transmission assumption  
363 of the law of mass-action. While these limitations may seem numerous, they do not impeded research  
364 on traditional models, and thereby should inhibit the theoretical extension and application of the  
365 broader class of models proposed here.

366

367 The traditional assumptions that reduce the integral equation version of the Kermack and McKendrick  
368 model to a system of differential equations provides disease modellers with a rich source for  
369 mathematical and scientific discovery. Here, we proposed a generalization of these traditional  
370 assumptions to a biologically more accurate description of the total infectivity of a disease. By imposing  
371 these new assumptions, we provide a more descript picture of how a disease propagates throughout a  
372 population, while retaining the convenience and simplicity of differential equation compartmental  
373 models.

374

375

376

## References

- 377 1. Kermack WO, McKendrick AG. Contributions to the mathematical theory of epidemics--III.  
378 Further studies of the problem of endemicity. 1933. Bull Math Biol. 1991;53: 89–118. Available:  
379 <http://www.ncbi.nlm.nih.gov/pubmed/2059743>
- 380 2. Kermack WO, McKendrick AG. Contributions to the mathematical theory of epidemics--II. The  
381 problem of endemicity.1932. Bull Math Biol. 1991;53: 57–87. Available:  
382 <http://www.ncbi.nlm.nih.gov/pubmed/2059742>
- 383 3. Kermack WO, McKendrick AG. Contributions to the mathematical theory of epidemics--I. 1927.  
384 Bull Math Biol. 1991;53: 33–55. Available: <http://www.ncbi.nlm.nih.gov/pubmed/2059741>
- 385 4. Diekmann O, Metz H, Heesterbeek H. The legacy of Kermack and McKendrick. In: Mollison D,  
386 editor. Epidemic Models: Their Structure and Relation to Data. Cambridge, UK: Cambridge  
387 University Press; 1995. pp. 95–115.
- 388 5. Brauer F. General compartmental epidemic models. Chinese Ann Math Ser B. 2010;31: 289–304.  
389 doi:10.1007/s11401-009-0454-1
- 390 6. Blackwood JC, Childs LM. An introduction to compartmental modeling for the budding infectious  
391 disease modeler. Lett Biomath. 2018;5: 195–221. doi:10.1080/23737867.2018.1509026
- 392 7. Roberts M, Andreasen V, Lloyd A, Pellis L. Nine challenges for deterministic epidemic models.  
393 Epidemics. 2015;10: 49–53. doi:10.1016/j.epidem.2014.09.006
- 394 8. Hethcote HW, Tudor DW. Integral equation models for endemic infectious diseases. J Math Biol.  
395 1980;9: 37–47. doi:10.1007/BF00276034
- 396 9. Lloyd AL. Realistic Distributions of Infectious Periods in Epidemic Models: Changing Patterns of  
397 Persistence and Dynamics. Theor Popul Biol. 2001;60: 59–71. doi:10.1006/tpbi.2001.1525

- 398 10. Feng Z, Xu D, Zhao H. Epidemiological models with non-exponentially distributed disease stages  
399 and applications to disease control. *Bull Math Biol.* 2007;69: 1511–36. doi:10.1007/s11538-006-  
400 9174-9
- 401 11. Kelly-Hope LA, McKenzie FE. The multiplicity of malaria transmission: a review of entomological  
402 inoculation rate measurements and methods across sub-Saharan Africa. *Malar J.* 2009;8: 19.  
403 doi:10.1186/1475-2875-8-19
- 404 12. Bailey NTJ, others. *The mathematical theory of infectious diseases and its applications.* Charles  
405 Griffin & Company Ltd, 5a Crendon Street, High Wycombe, Bucks HP13 6LE.; 1975.
- 406 13. Bailey NTJ. On Estimating the Latent and Infectious Periods of Measles: I. Families with Two  
407 Susceptibles Only. *Biometrika.* 1956;43: 15. doi:10.2307/2333574
- 408 14. Gough KJ. The estimation of latent and infectious periods. *Biometrika.* Biometrika Trust; 1977;64:  
409 559–565.
- 410 15. Earn DJ. A Simple Model for Complex Dynamical Transitions in Epidemics. *Science* (80- ).  
411 2000;287: 667–670. doi:10.1126/science.287.5453.667
- 412 16. Hethcote HW, van den Driessche P. Some epidemiological models with nonlinear incidence. *J*  
413 *Math Biol.* 1991;29: 271–87. Available: <http://www.ncbi.nlm.nih.gov/pubmed/2061695>
- 414 17. Ponciano JM, Capistrán MA. First Principles Modeling of Nonlinear Incidence Rates in Seasonal  
415 Epidemics. Pascual M, editor. *PLoS Comput Biol.* 2011;7: e1001079.  
416 doi:10.1371/journal.pcbi.1001079
- 417 18. Alexander ME, Moghadas SM. Bifurcation Analysis of an SIRS Epidemic Model with Generalized  
418 Incidence. *SIAM J Appl Math.* 2005;65: 1794–1816. doi:10.1137/040604947
- 419 19. Liu WM, Hethcote HW, Levin SA. Dynamical behavior of epidemiological models with nonlinear

- 420 incidence rates. *J Math Biol.* 1987;25: 359–80. Available:  
421 <http://www.ncbi.nlm.nih.gov/pubmed/3668394>
- 422 20. Liu WM, Levin SA, Iwasa Y. Influence of nonlinear incidence rates upon the behavior of SIRS  
423 epidemiological models. *J Math Biol.* 1986;23: 187–204. Available:  
424 <http://www.ncbi.nlm.nih.gov/pubmed/3958634>
- 425 21. Ruan S, Wang W. Dynamical behavior of an epidemic model with a nonlinear incidence rate. *J*  
426 *Differ Equ.* 2003;188: 135–163. doi:10.1016/S0022-0396(02)00089-X
- 427 22. Greenhalgh S, Day T. Time-varying and state-dependent recovery rates in epidemiological  
428 models. *Infect Dis Model.* 2017; doi:10.1016/j.idm.2017.09.002
- 429 23. Greenhalgh S, Galvani AP, Medlock J. Disease elimination and re-emergence in differential-  
430 equation models. *J Theor Biol.* 2015;387: 174–80. doi:10.1016/j.jtbi.2015.09.037
- 431 24. Greenhalgh S, Hobbs C V., Parikh S. Brief Report: Antimalarial Benefit of HIV Antiretroviral  
432 Therapy in Areas of Low to Moderate Malaria Transmission Intensity. *J Acquir Immune Defic*  
433 *Syndr.* 2018;79: 249–254. doi:10.1097/QAI.0000000000001783
- 434 25. Greenhalgh S, Ndeffo M, Galvani AP, Parikh S. The epidemiological impact of HIV antiretroviral  
435 therapy on malaria in children. *AIDS.* 2015;29: 473–82. doi:10.1097/QAD.0000000000000550
- 436 26. Day T, Proulx SR. A general theory for the evolutionary dynamics of virulence. *Am Nat.* 2004;163:  
437 E40-63. doi:10.1086/382548
- 438 27. Casagrandi R, Bolzoni L, Levin SA, Andreasen V. The SIRC model and influenza A. *Math Biosci.*  
439 2006;200: 152–169. doi:10.1016/j.mbs.2005.12.029
- 440 28. Tchuenche J, Garira W, Gumel A, Mukandavire Z. Mathematical analysis of a model for HIV-  
441 malaria co-infection. *Math Biosci Eng.* 2009;6: 333–362. doi:10.3934/mbe.2009.6.333

- 442 29. Heffernan JM, Smith RJ, Wahl LM. Perspectives on the basic reproductive ratio. *J R Soc Interface*.  
443 2005;2: 281–93. doi:10.1098/rsif.2005.0042
- 444 30. Gupta RC, Bradley DM. Representing the mean residual life in terms of the failure rate. *Math*  
445 *Comput Model*. 2003;37: 1271–1280. doi:10.1016/S0895-7177(03)90038-0
- 446 31. Finkelstein MS. On the reversed hazard rate. *Reliab Eng Syst Saf*. 2002;78: 71–75.  
447 doi:10.1016/S0951-8320(02)00113-8
- 448 32. Krylova O, Earn DJD. Effects of the infectious period distribution on predicted transitions in  
449 childhood disease dynamics. *J R Soc Interface*. 2013;10: 20130098–20130098.  
450 doi:10.1098/rsif.2013.0098
- 451 33. Hurtado PJ, Kiro Singh AS. Generalizations of the ‘Linear Chain Trick’: incorporating more flexible  
452 dwell time distributions into mean field ODE models. *J Math Biol*. 2019; doi:10.1007/s00285-019-  
453 01412-w
- 454 34. Pearson K. Contributions to the Mathematical Theory of Evolution. *Proc R Soc London*. 1893;54:  
455 329–333. doi:10.1098/rspl.1893.0079
- 456 35. Pearson K. Contributions to the Mathematical Theory of Evolution. II. Skew Variation in  
457 Homogeneous Material. *Philos Trans R Soc A Math Phys Eng Sci*. 1895;186: 343–414.  
458 doi:10.1098/rsta.1895.0010
- 459 36. Papathanasiou V. A characterization of the Pearson system of distributions and the associated  
460 orthogonal polynomials. *Ann Inst Stat Math*. 1995;47: 171–176. doi:10.1007/BF00773421
- 461
